# Supplementary material
Source: Springer Nature journal article supplement (doi:10.1186/2190-4286-7-182)
Supplement: Additional file 1 [file 2190-4286-7-182-S1.pdf]

# Supporting Information

for

## **Facile fabrication of luminescent organic dots by thermolysis of citric acid in urea melt, and their use for cell staining and polyelectrolyte microcapsule labelling**

Nadezhda M. Zholobak<sup>1</sup>, Anton L. Popov<sup>2</sup>, Alexander B. Shcherbakov<sup>1</sup>, Nelly R. Popova<sup>2</sup>, Mykhailo M. Guzyk<sup>3</sup>, Valeriy P. Antonovich<sup>4</sup>, Alla V. Yegorova<sup>4</sup>, Yuliya V. Scrypynets<sup>4</sup>, Inna I. Leonenko<sup>4</sup>, Alexander Ye. Baranchikov<sup>5</sup> and Vladimir K. Ivanov<sup>\*5,6</sup>

Addresses: <sup>1</sup>Zabolotny Institute of Microbiology and Virology, National Academy of Sciences of Ukraine, Kyiv 03680, Ukraine; <sup>2</sup>Institute of Theoretical and Experimental Biophysics, Pushchino 142290, Russia; <sup>3</sup>Palladin Institute of Biochemistry NAS of Ukraine, Kyiv 01601, Ukraine; <sup>4</sup>Bogatsky Physico-Chemical Institute, National Academy of Sciences of Ukraine, Odessa 65080, Ukraine; <sup>5</sup>Kurnakov Institute of General and Inorganic Chemistry of the Russian Academy of Sciences, Moscow 119991, Russia and <sup>6</sup>National Research Tomsk State University, Tomsk 634050, Russia

Email: Vladimir K. Ivanov\* - van@igic.ras.ru

\* Corresponding author

## **Additional pictures and experimental data**

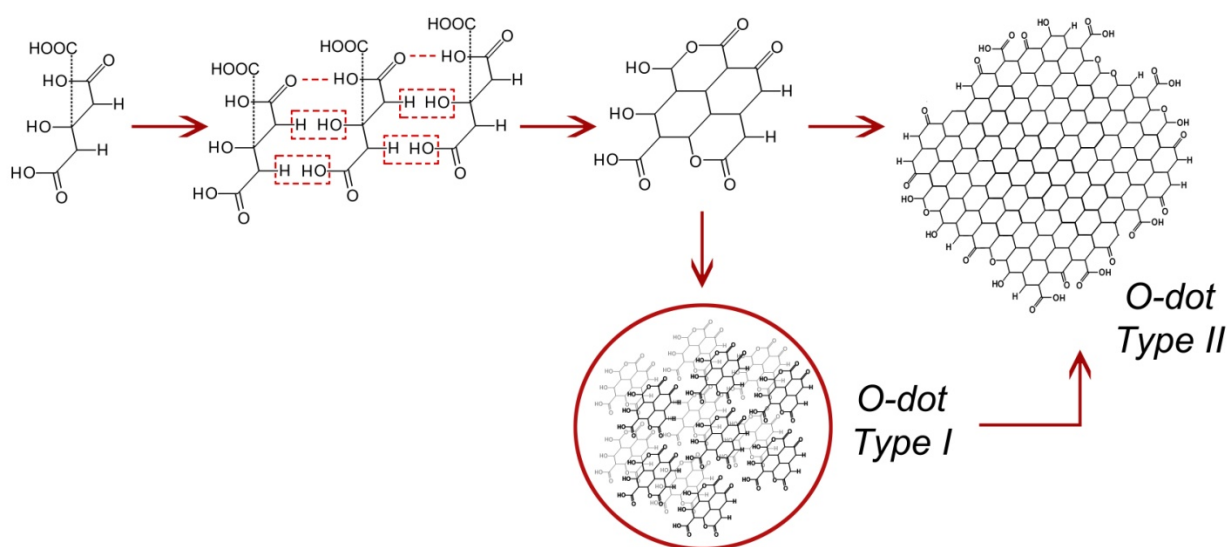

**Figure S1:** Formation mechanism of type-I and type-II carbon dots starting from citric acid. The intermediate “primary fluorophore” is a nominal (meaningless) unit.

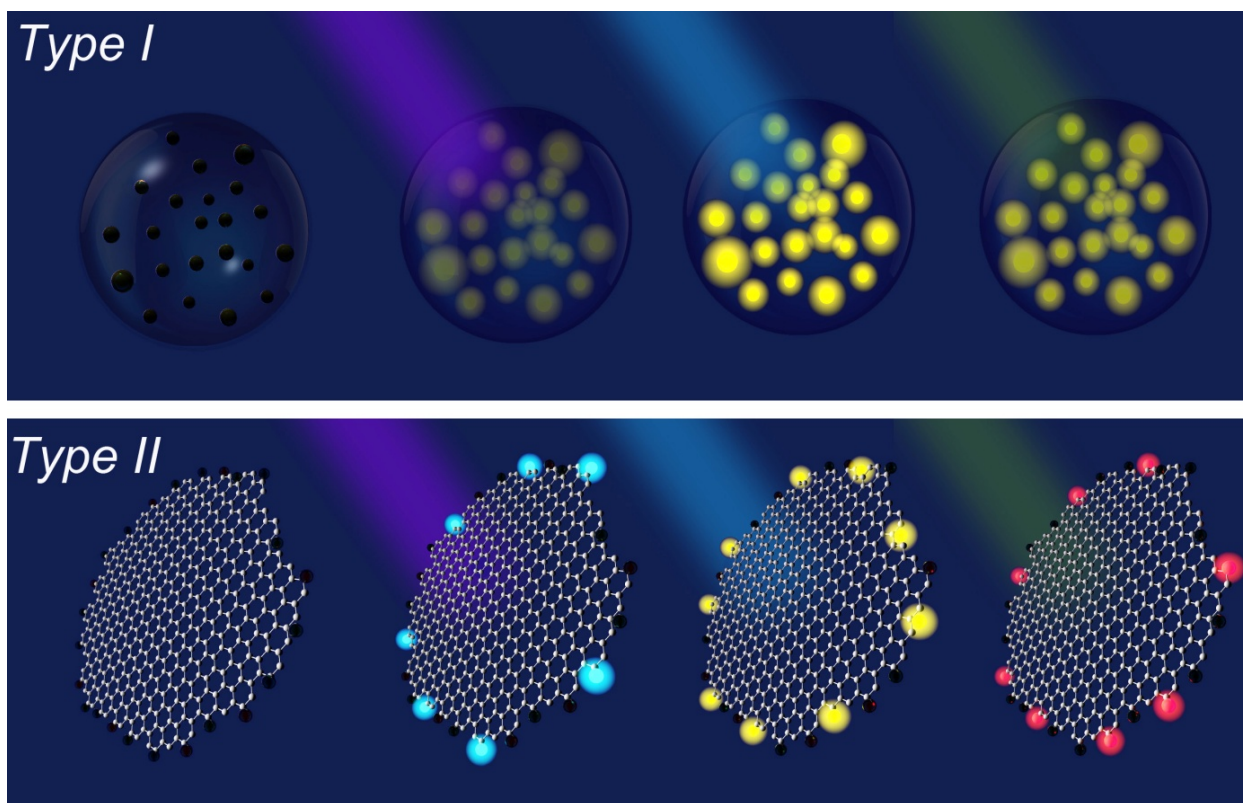

**Figure S2:** Schematic illustration of the O-dots' luminescence upon excitation with light of different wavelengths.

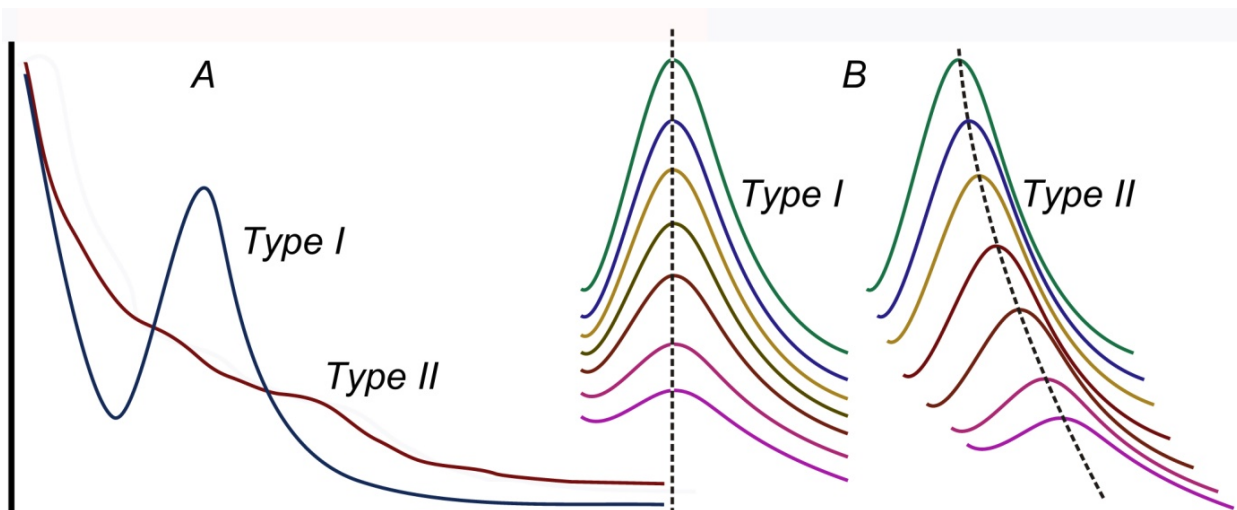

**Figure S3:** A – Typical absorption spectra of O-dots. B – Typical dependence of the luminescence spectra of O-dots on excitation wavelength.

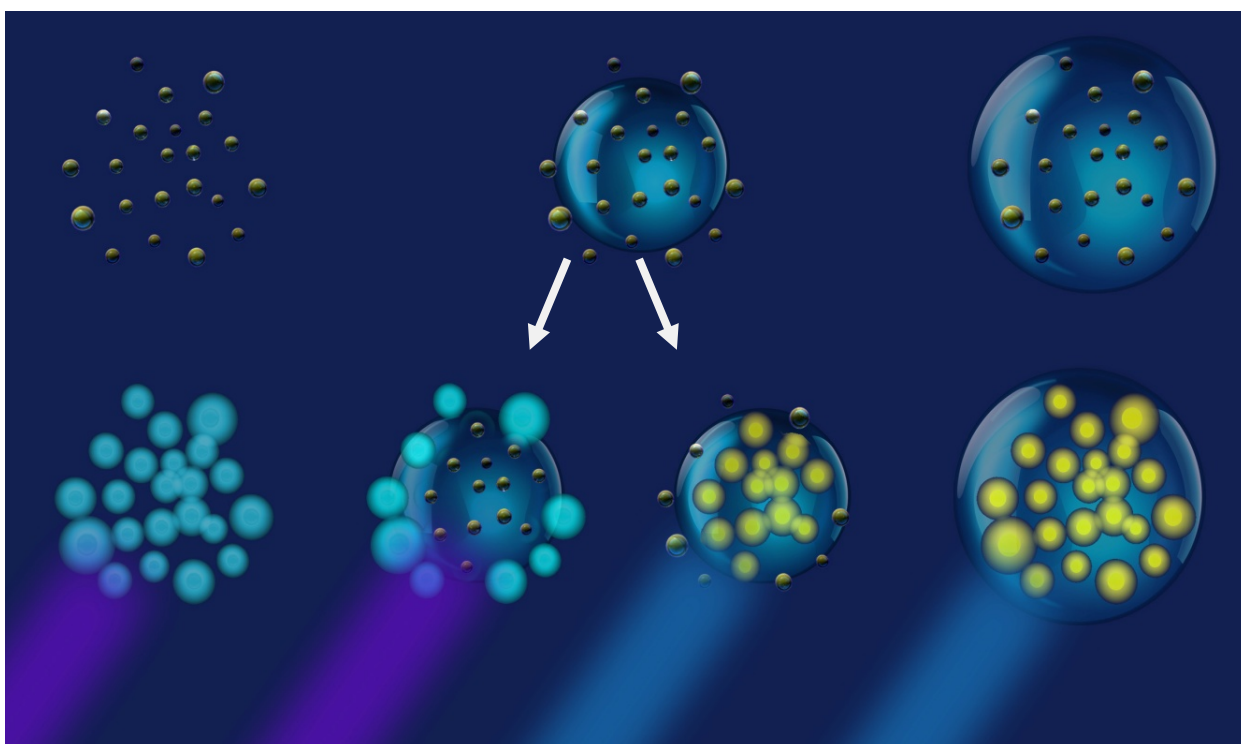

**Figure S4:** Schematic illustration of a possible change in the luminescence colour of the type-I O-dots during the process of their formation and growth; the luminescence of the intermediate cluster could be bimodal.

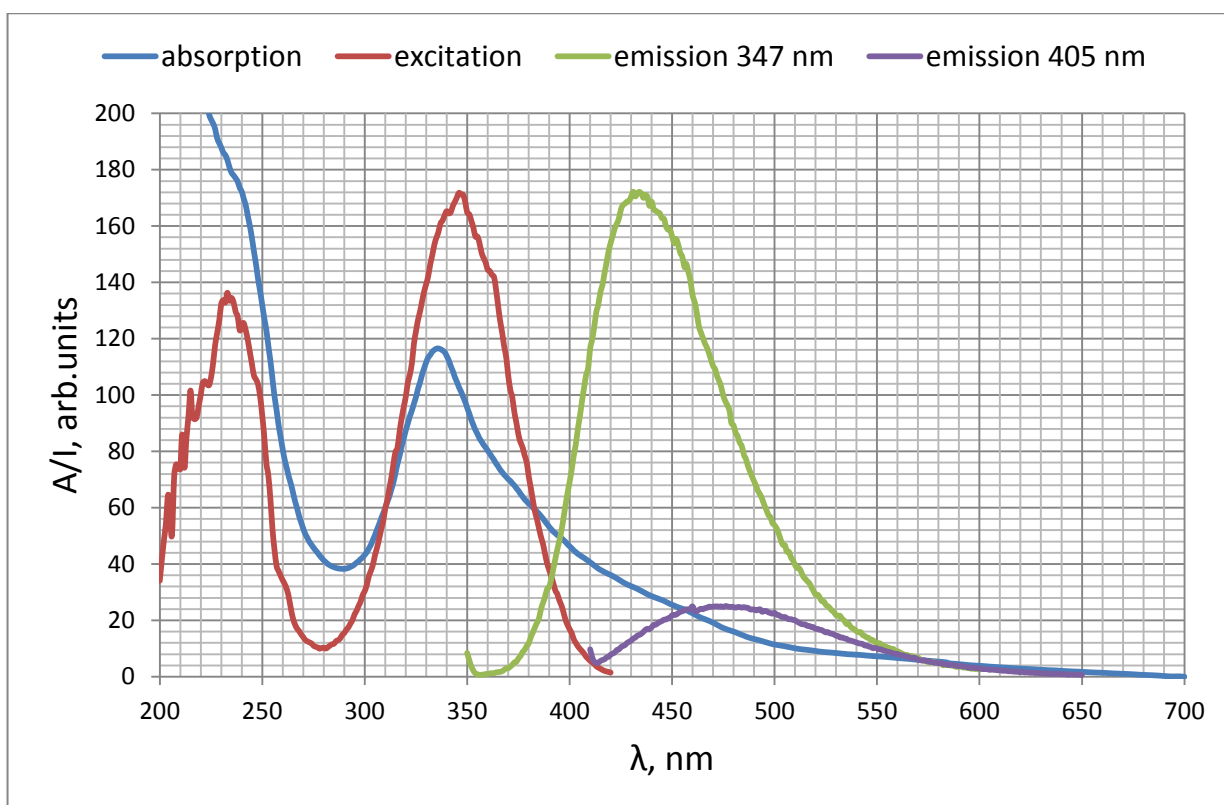

**Figure S5:** Absorption, excitation and emission spectra of the triammonium citrate heated at 160 °C for 120 min (aqueous solution, 2 μg/mL).

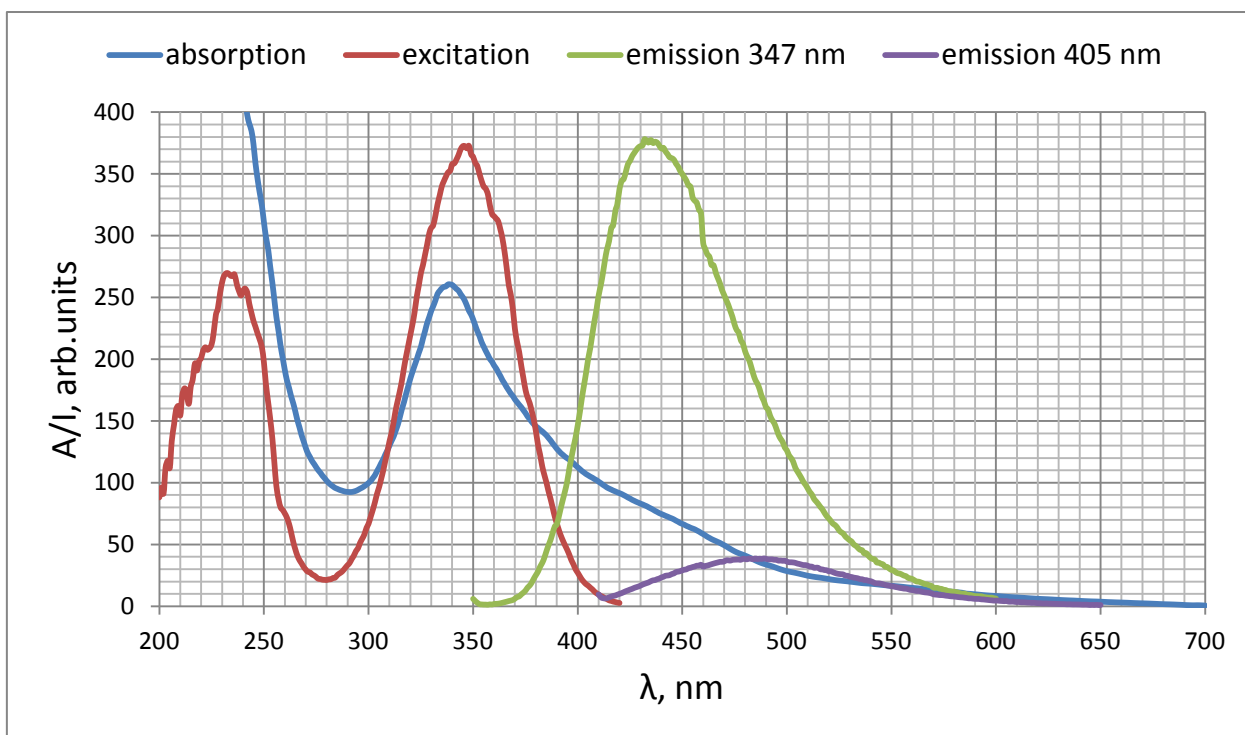

**Figure S6:** Absorption, excitation and emission spectra of the mixture of urea and citric acid (molar ratio 1:1) heated at 160 °C for 120 min (aqueous solution, 2 μg/mL).

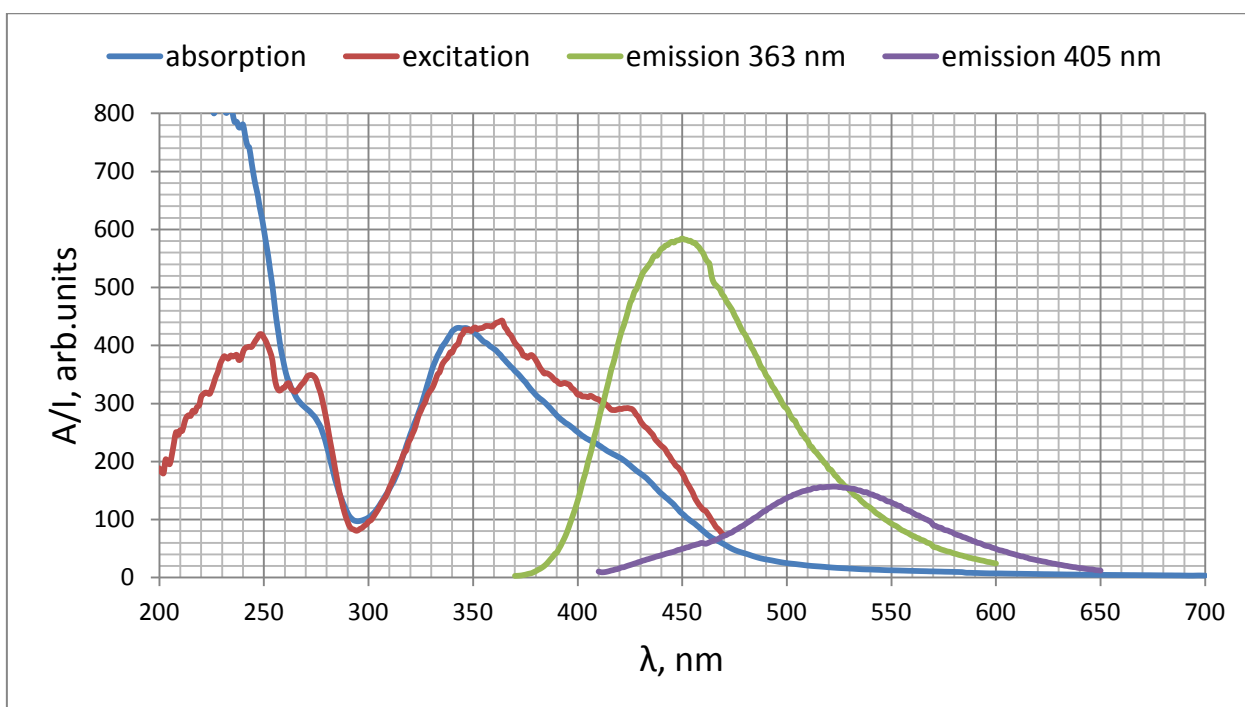

**Figure S7:** Absorption, excitation and emission spectra of the mixture of urea and citric acid (molar ratio 2:1) heated at 160 °C for 120 min (aqueous solution, 2  $\mu\text{g/mL}$ ).

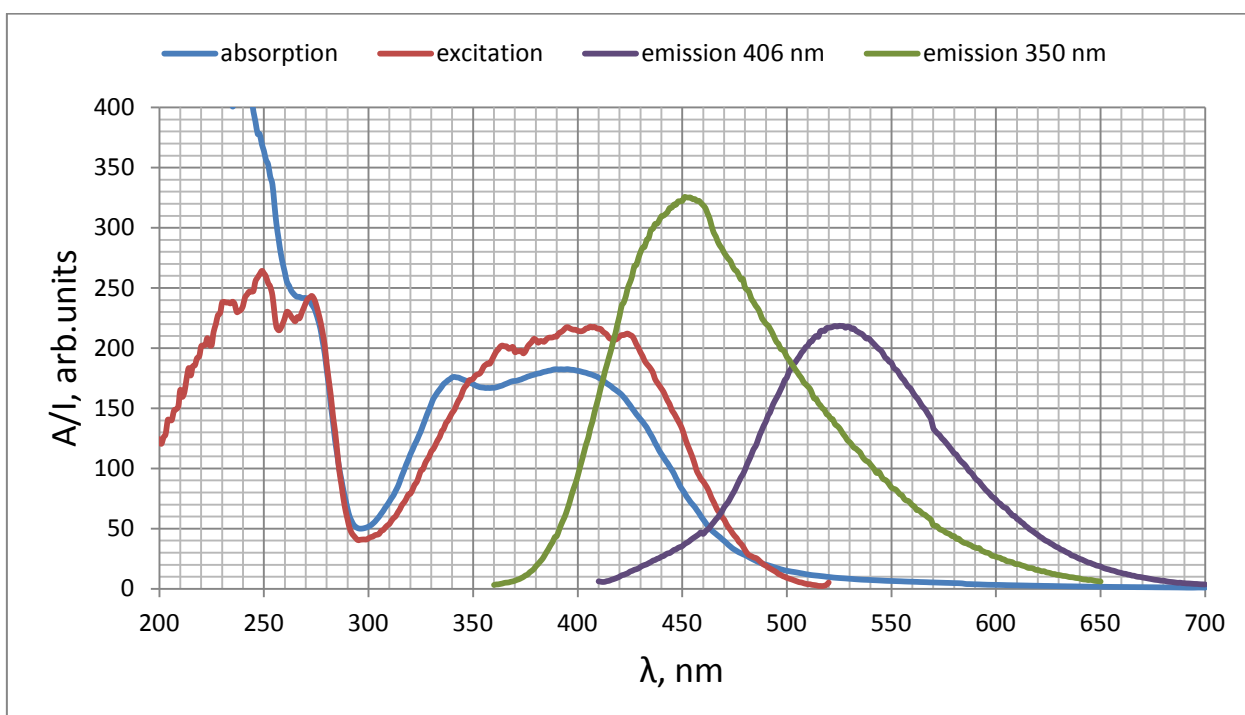

**Figure S8:** Absorption, excitation and emission spectra of the mixture of urea and citric acid (molar ratio 3:1) heated at 160 °C for 120 min (aqueous solution, 2  $\mu\text{g/mL}$ ).

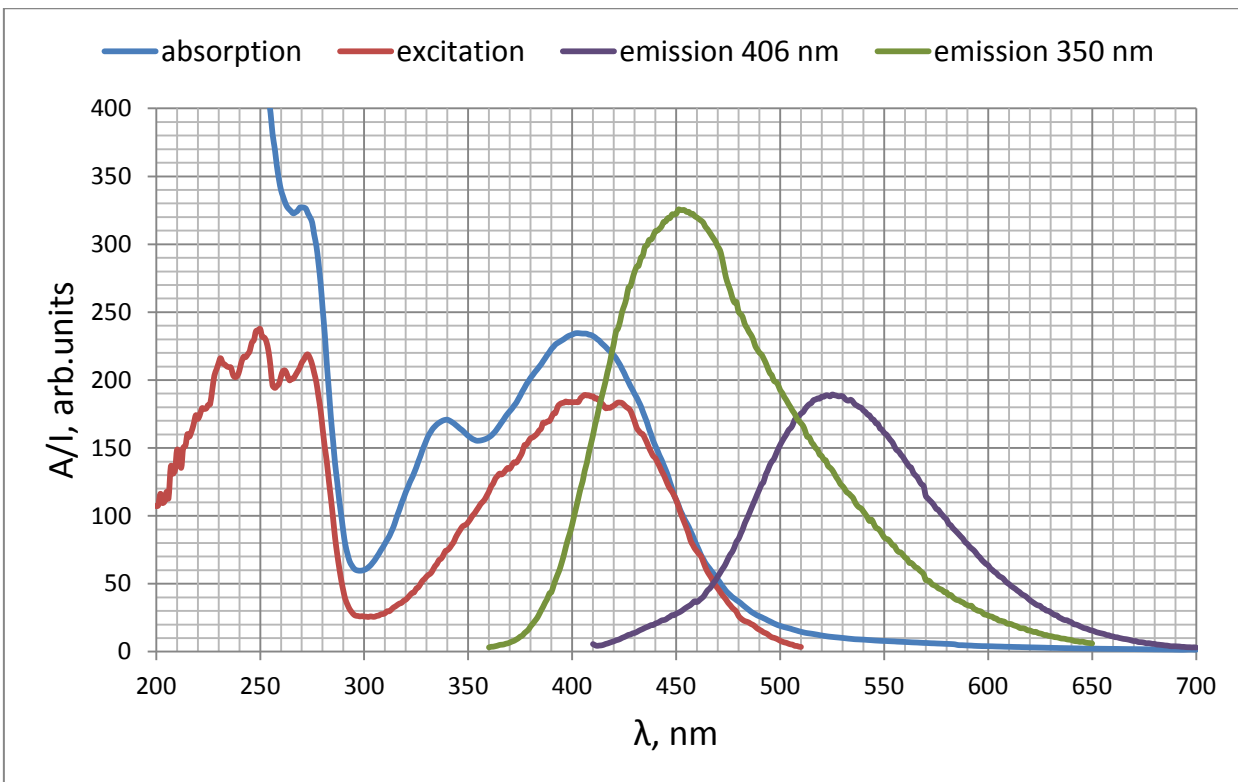

**Figure S9:** Absorption, excitation and emission spectra of the mixture of urea and citric acid (molar ratio 4:1) heated at 160 °C for 120 min (aqueous solution, 2 μg/mL).

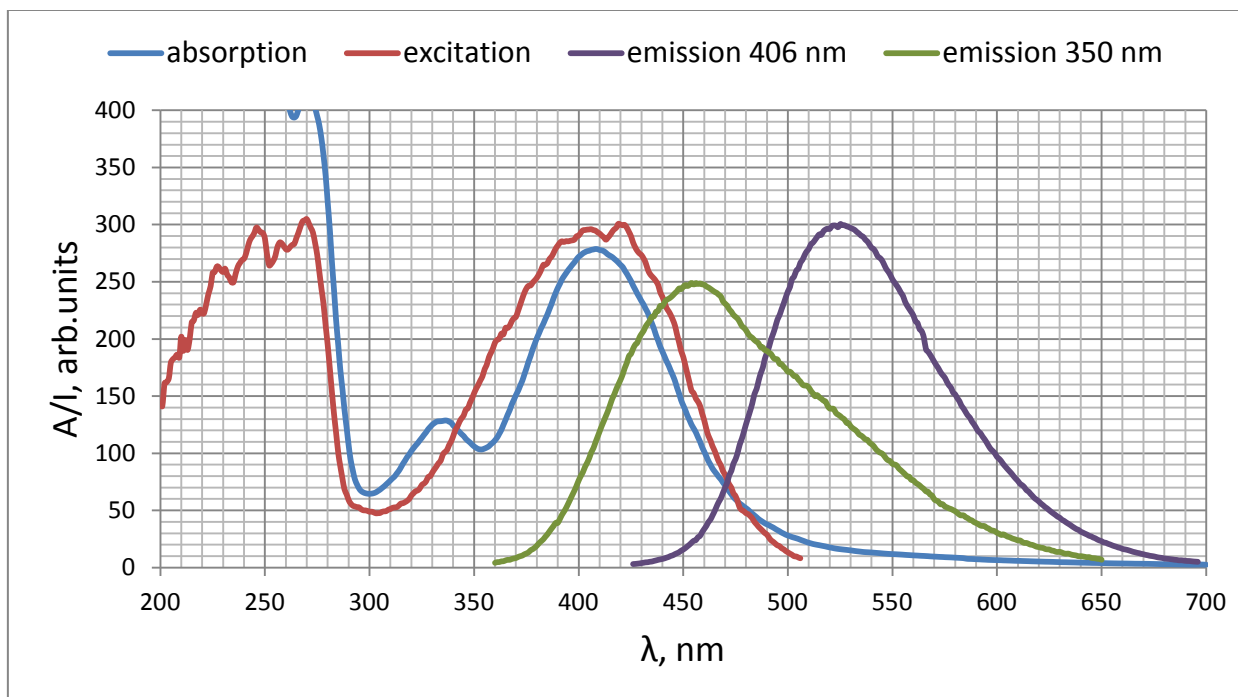

**Figure S10:** Absorption, excitation and emission spectra of the mixture of urea and citric acid (molar ratio 5:1) heated at 160 °C for 120 min (aqueous solution, 2 μg/mL).

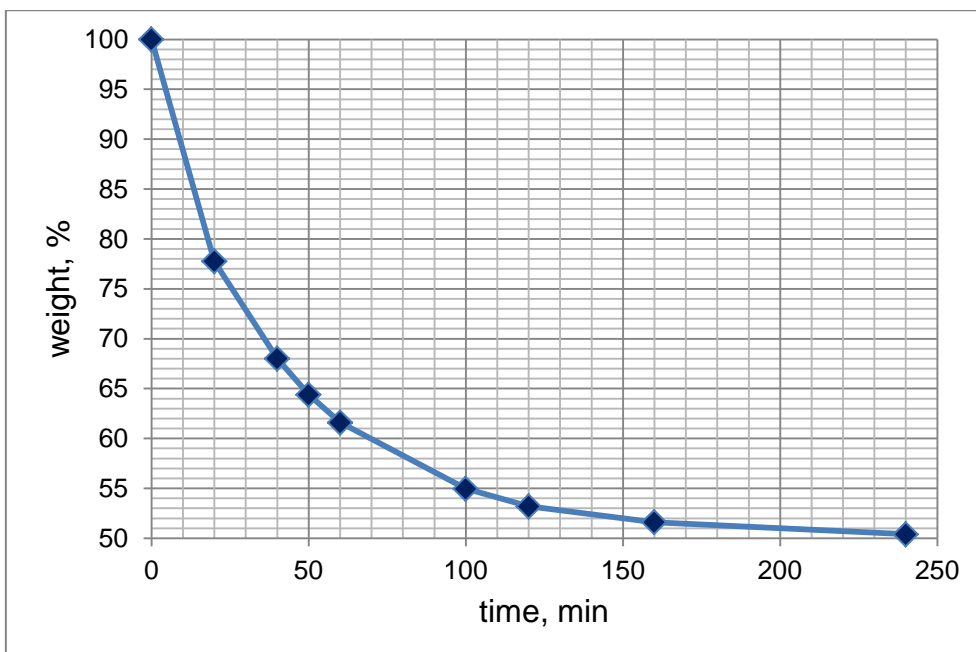

**Figure S11:** The dynamics of the weight loss of the citric acid and urea (1:5 mol) mixture during heating at 160 °C.

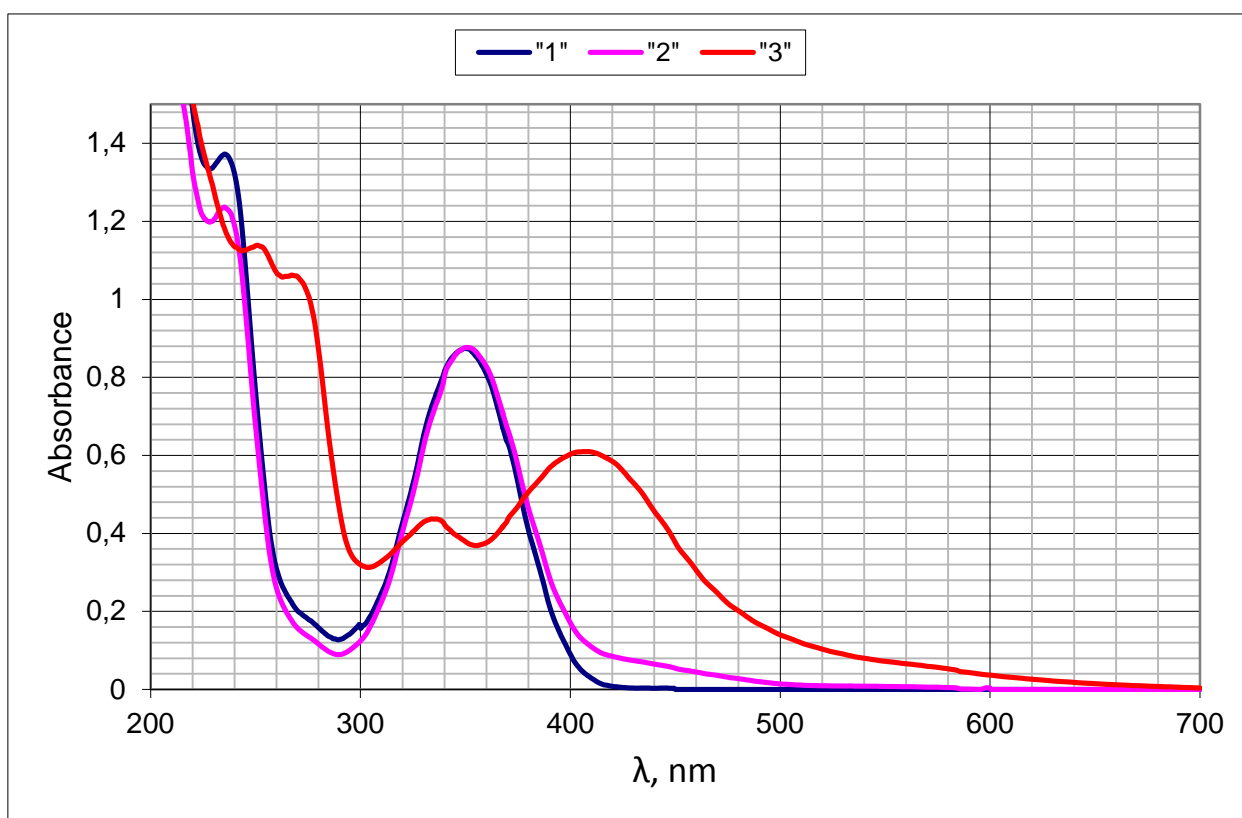

**Figure S12:** UV-absorption spectra of ammonium citrazinate (1), and the same compound heated at 160 °C for 120 min in the absence (2) and in the presence (3) of urea excess.

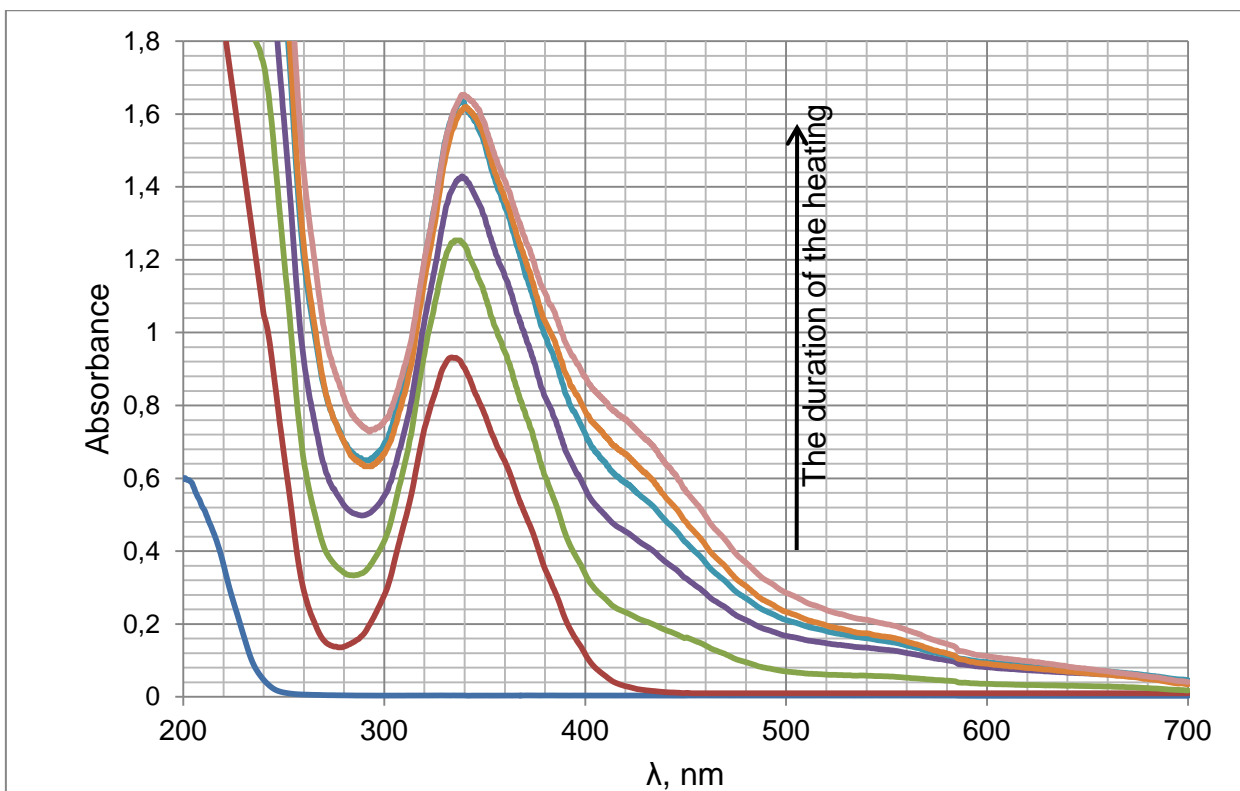

**Figure S13:** Changes in the absorption spectra of triammonium citrate upon heating at 160 °C for 0–360 min.

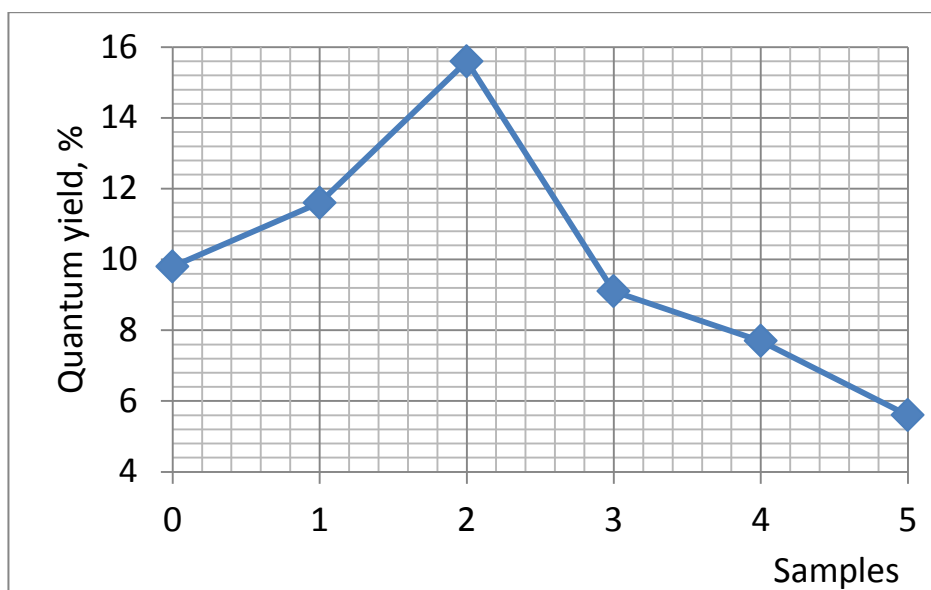

**Figure S14:** Quantum yields of the urea and citric acid mixtures heated at 160 °C for 120 min at optimal excitation wavelengths: “0”, “1” – ex. 347 nm/em.431 nm; “2” – ex. 363 nm/em. 450 nm; “3”, “4” – ex. 406 nm/em. 525 nm, “5” – ex. 406 nm/em. 529 nm. The number of samples corresponds to the urea: citric acid molar ratio; sample “0” is a product of thermal treatment of triammonium citrate under the same conditions.



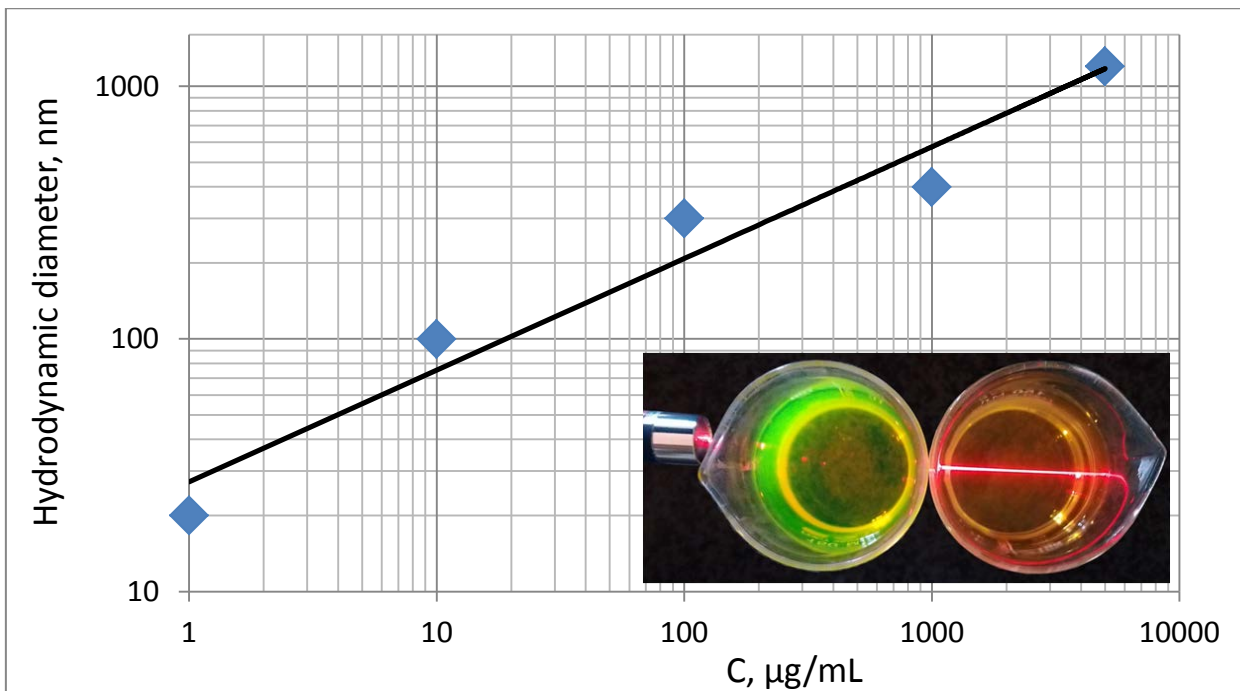

**Figure S15:** Dependence of O-dots' mean hydrodynamic diameter on their concentration in aqueous sol. Insert: Red laser beam in the 100 µg/mL fluorescein solution (left, no trace), and in the 100 mg/mL O-dots sol (right, Tyndall effect).

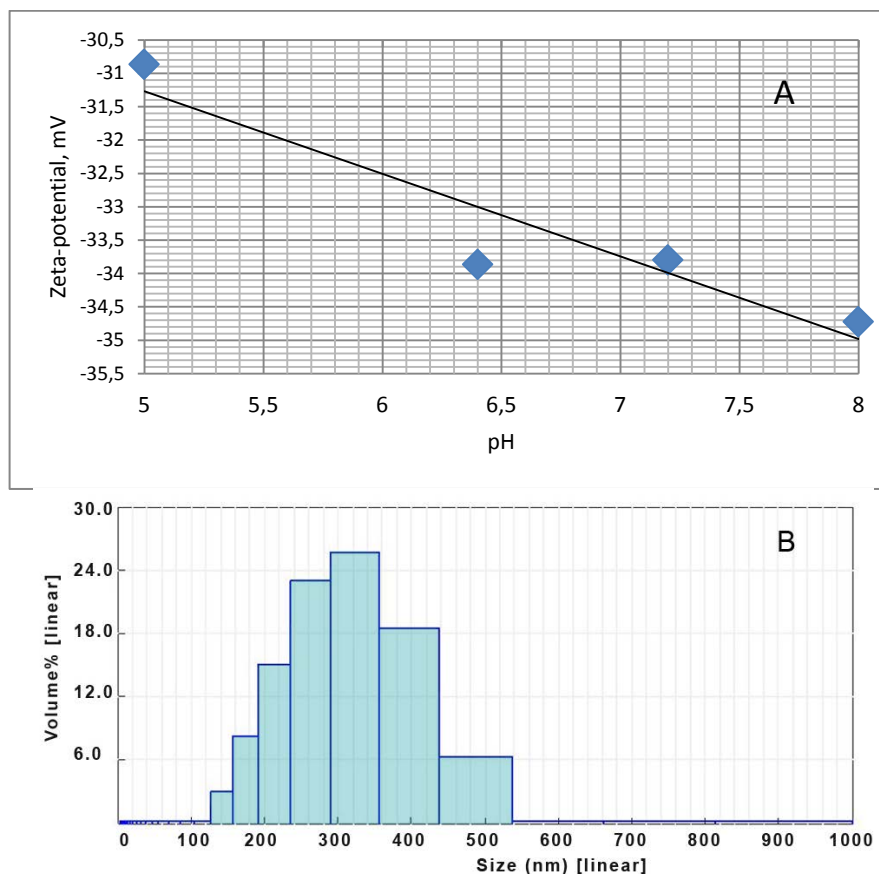

**Figure S16:** A – Dependence of O-dots' zeta-potential on the pH of aqueous sol; B – size distribution of hydrodynamic diameters of O-dots taken in 100 µg/mL concentration.

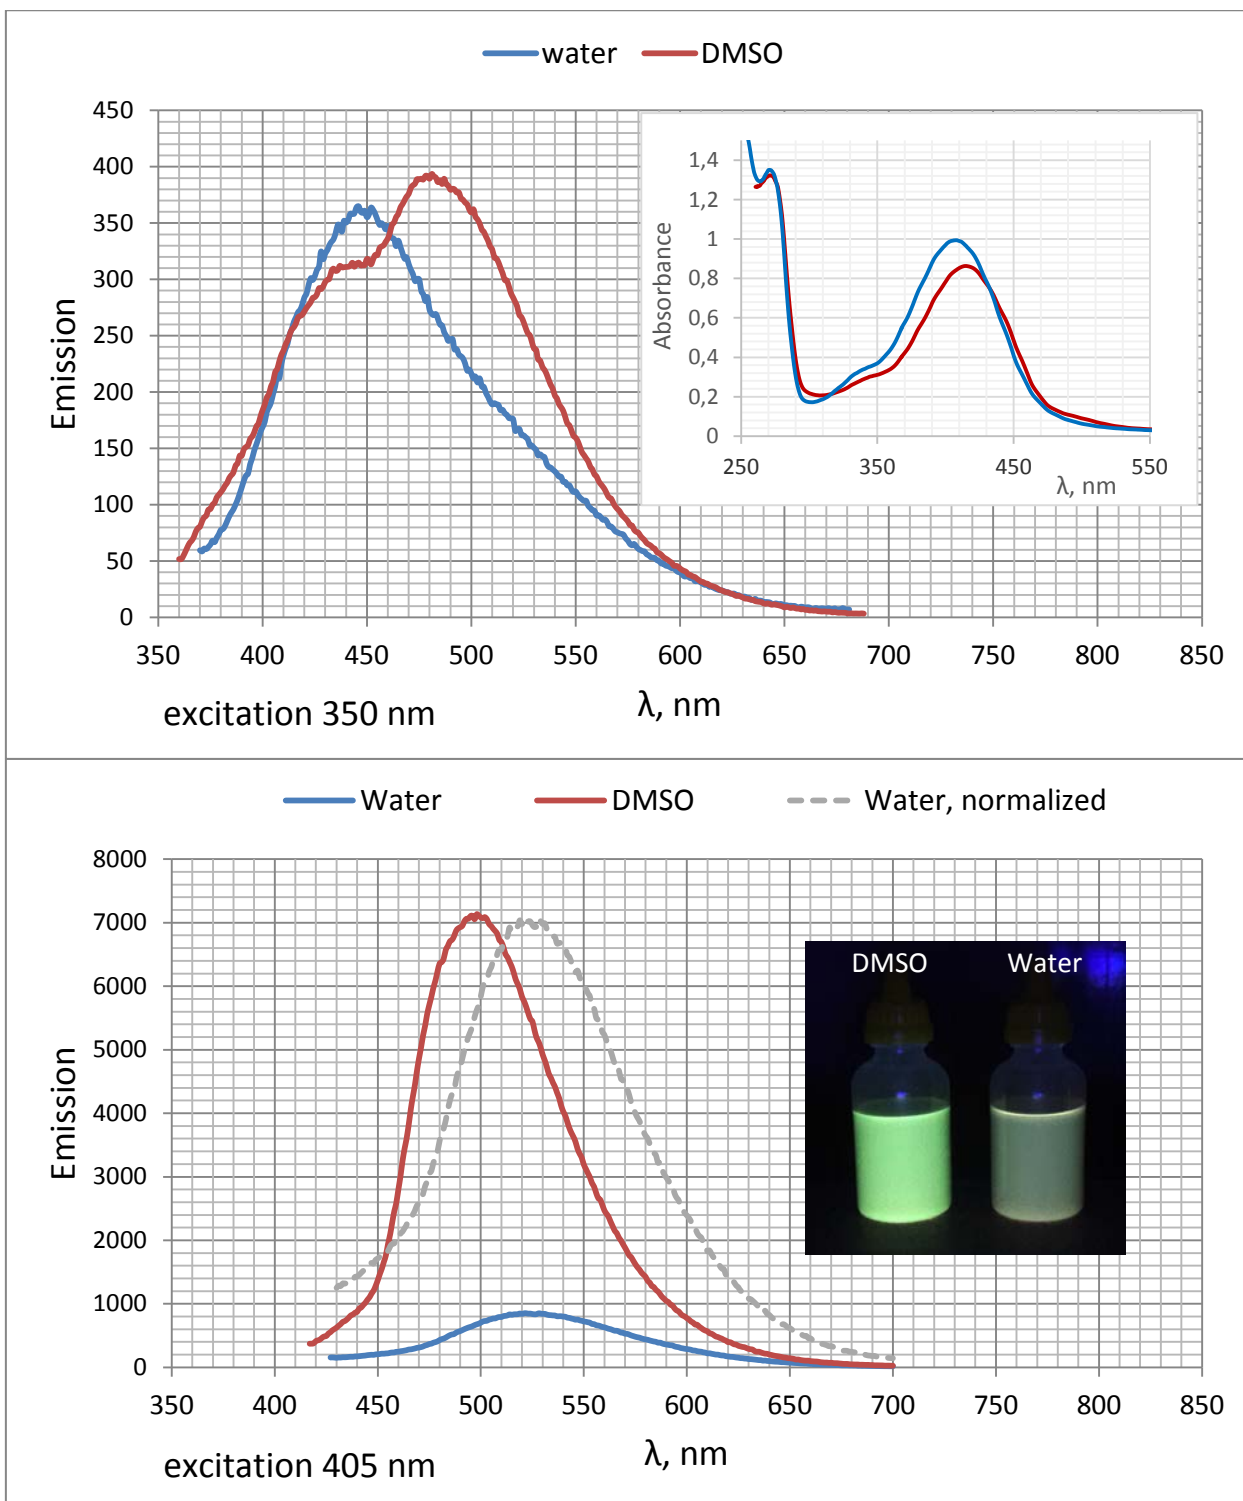

**Figure S17:** Luminescence spectra (350 nm and 405 nm excitation) of the O-dots in DMSO and water (relative and normalized). Inset: above – UV-absorption spectra of the O-dots in DMSO and water, below – appearance of equimolar sols of O-dots in DMSO and water under UV lamp.

**Table S1:** The number of adherent ST-cells upon 24 hours' exposure with different concentrations of O-dots synthesized from citric acid:urea (1:5 mol) mixtures, heated for different time intervals.

| Time, min→<br>µg/mL↓ | 0      | 5      | 12    | 20     | 30     | 45     | 70     | 90     | 160    | Cells control |
|----------------------|--------|--------|-------|--------|--------|--------|--------|--------|--------|---------------|
| 5000                 | 27.33  | 19.29  | 23.79 | 40.84  | 39.23  | 53.38  | 60.45  | 55.63  | 61.41  | 100.00        |
| 2500                 | 57.23  | 93.25  | 87.14 | 91.00  | 85.21  | 95.50  | 91.96  | 103.22 | 130.23 | 100.00        |
| 1250                 | 82.32  | 97.43  | 87.46 | 84.24  | 84.50  | 109.32 | 107.40 | 95.18  | 110.29 | 100.00        |
| 625                  | 94.86  | 96.14  | 93.89 | 69.45  | 82.32  | 107.40 | 113.83 | 95.50  | 109.00 | 100.00        |
| 312                  | 100.64 | 91.61  | 92.57 | 73.63  | 87.14  | 106.75 | 97.53  | 98.39  | 113.18 | 100.00        |
| 156                  | 106.43 | 87.14  | 88.10 | 88.75  | 90.68  | 109.32 | 98.42  | 97.11  | 106.75 | 100.00        |
| 78                   | 109.00 | 99.04  | 98.39 | 96.78  | 107.07 | 98.39  | 106.11 | 93.25  | 115.76 | 100.00        |
| 39                   | 98.82  | 102.25 | 97.46 | 116.40 | 98.18  | 108.04 | 111.58 | 104.50 | 112.22 | 100.00        |

**Table S2:** The activity of NADP-H-dependent mitochondrial oxidoreductases in ST-cells upon 24 hours' exposure with different concentrations of O-dots synthesized from citric acid:urea (1:5 mol) mixtures, heated for different time intervals.

| Time, min→<br>µg/mL↓ | 0      | 5      | 12     | 20     | 30     | 45     | 70     | 90     | 160    | Cells control |
|----------------------|--------|--------|--------|--------|--------|--------|--------|--------|--------|---------------|
| 5000                 | 93.14  | 72.22  | 80.09  | 81.89  | 62.99  | 63.44  | 71.32  | 71.32  | 78.29  | 100.00        |
| 2500                 | 101.91 | 93.14  | 93.14  | 93.81  | 75.82  | 76.72  | 75.59  | 72.89  | 82.56  | 100.00        |
| 1250                 | 101.01 | 91.11  | 94.04  | 96.51  | 93.14  | 77.17  | 76.04  | 79.42  | 90.89  | 100.00        |
| 625                  | 99.66  | 94.49  | 91.56  | 100.56 | 93.36  | 77.84  | 78.07  | 78.07  | 83.91  | 100.00        |
| 312                  | 105.29 | 99.89  | 104.61 | 99.89  | 104.16 | 86.39  | 83.46  | 87.06  | 92.69  | 100.00        |
| 156                  | 103.94 | 100.34 | 97.64  | 97.86  | 103.26 | 86.61  | 84.59  | 88.86  | 105.06 | 100.00        |
| 78                   | 100.56 | 99.44  | 102.36 | 103.94 | 98.76  | 105.06 | 105.74 | 101.46 | 104.39 | 100.00        |
| 39                   | 99.66  | 99.21  | 96.06  | 97.64  | 96.96  | 102.81 | 101.01 | 101.91 | 104.39 | 100.00        |

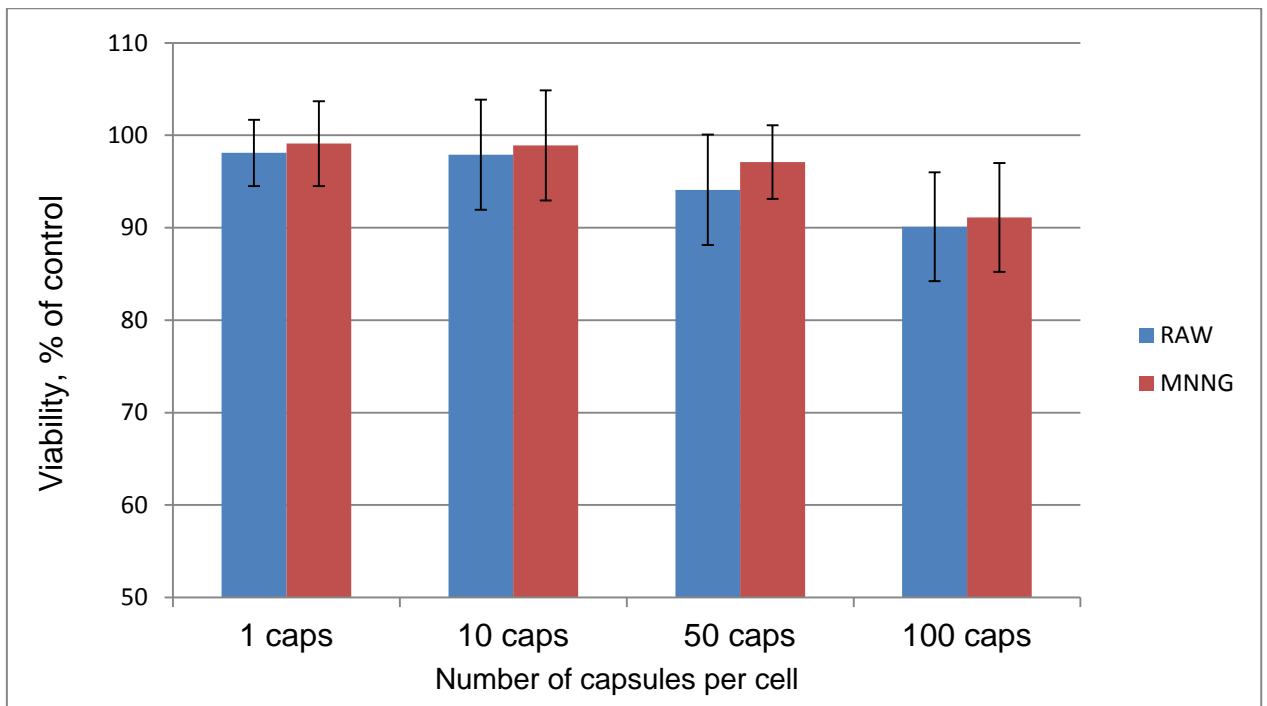

**Figure S18:** MTT assay upon 24 hours' incubation of the cells with microcapsules decorated with O-dots.

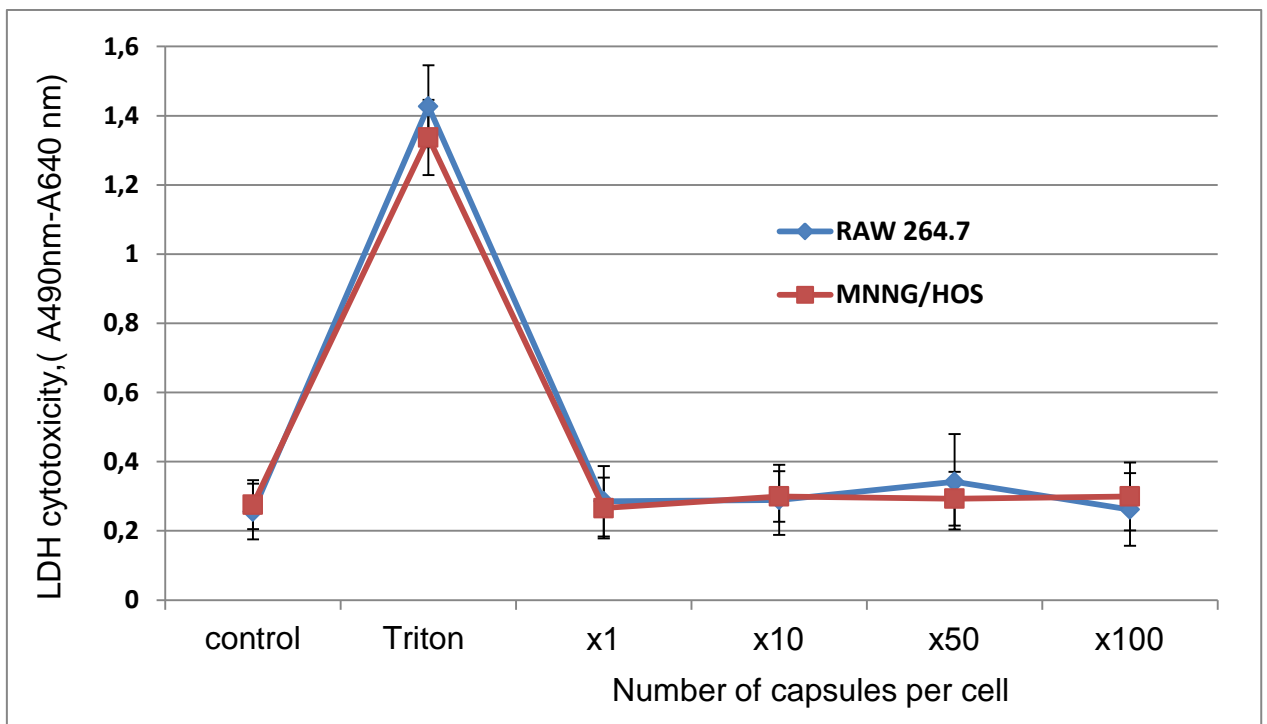

**Figure S19:** LDH assay upon 24 hours' incubation of cells with microcapsules decorated with O-dots.

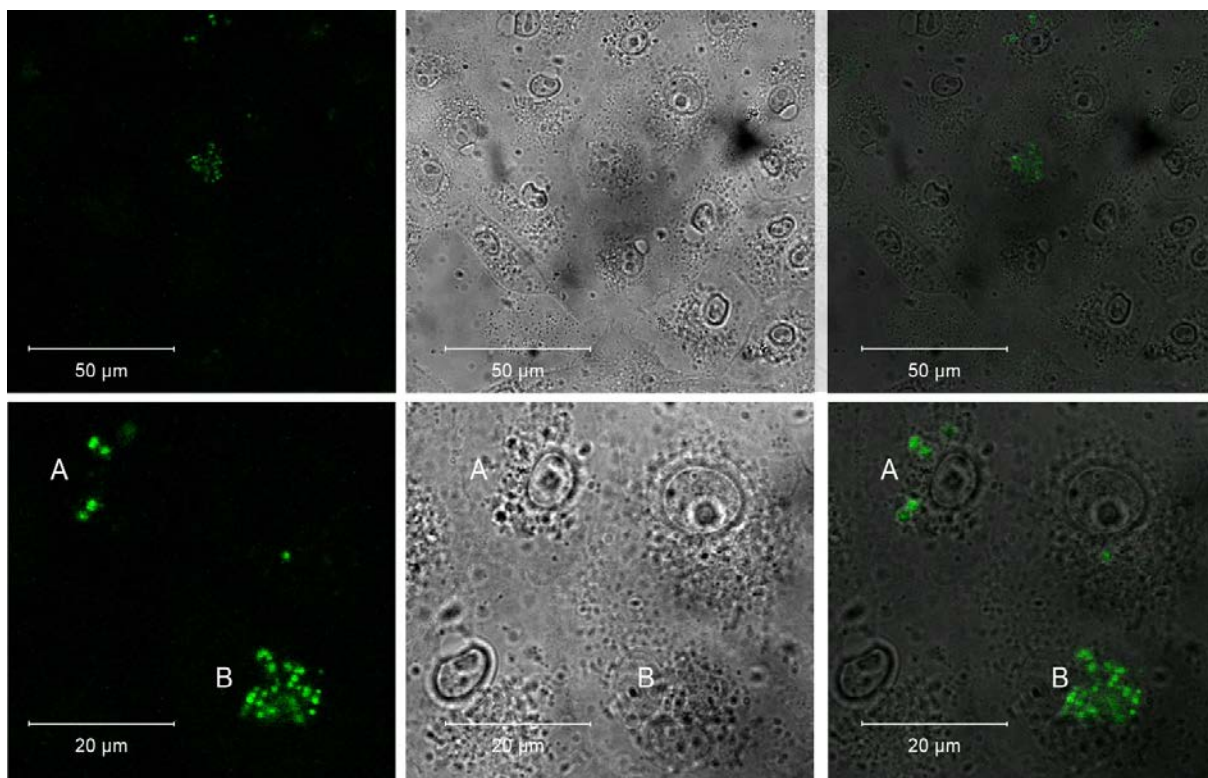

**Figure S20:** ST cells treated with hydrogen peroxide and stained by O-dots (50 µg/mL) without fixation. Left to right: fluorescence microscopy image (488 nm excitation), bright-field microscopy image, overlay image. The first row – standard image of the cells; the second row – enlarged image. A - Stained apoptotic bodies; B - Cell destroyed in the dividing stage.

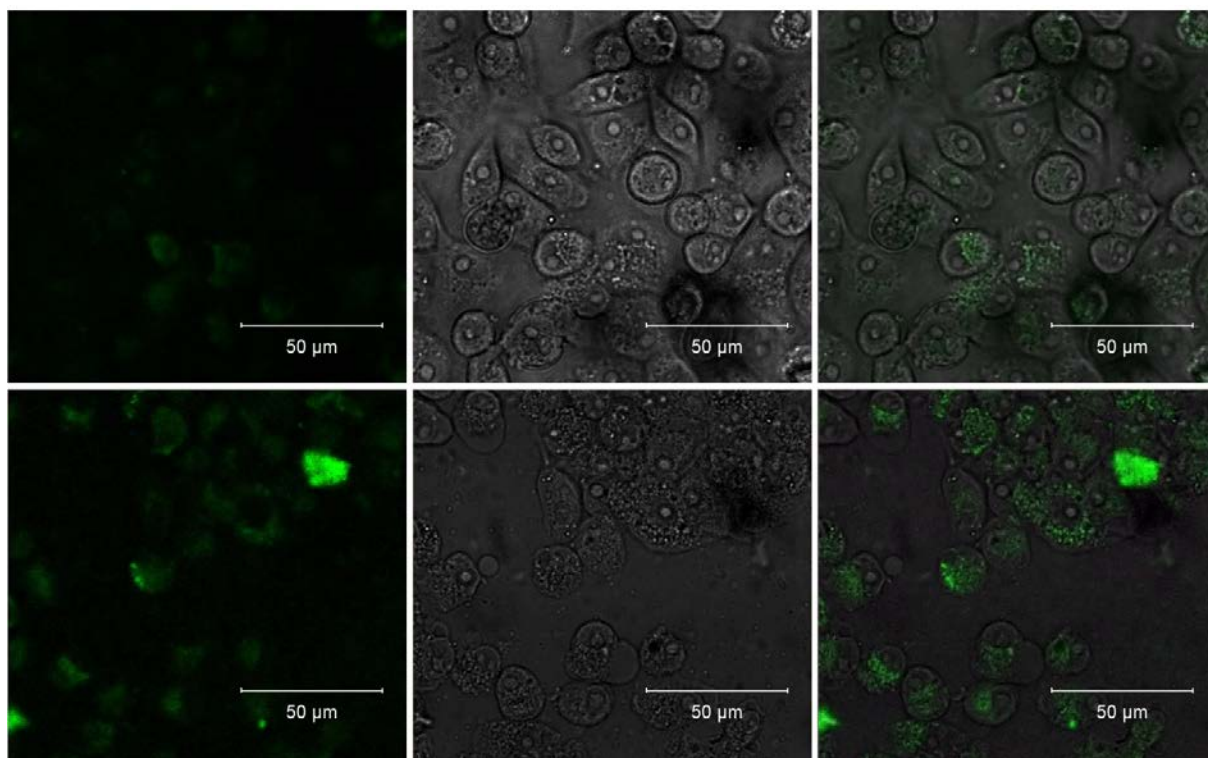

**Figure S21:** ST cells stained by O-dots (125 µg/mL) without fixation. Left to right: fluorescence microscopy image (488 nm excitation), bright-field microscopy image, overlay image. The first row – intact healthy cells; the second row – cells treated with hydrogen peroxide.

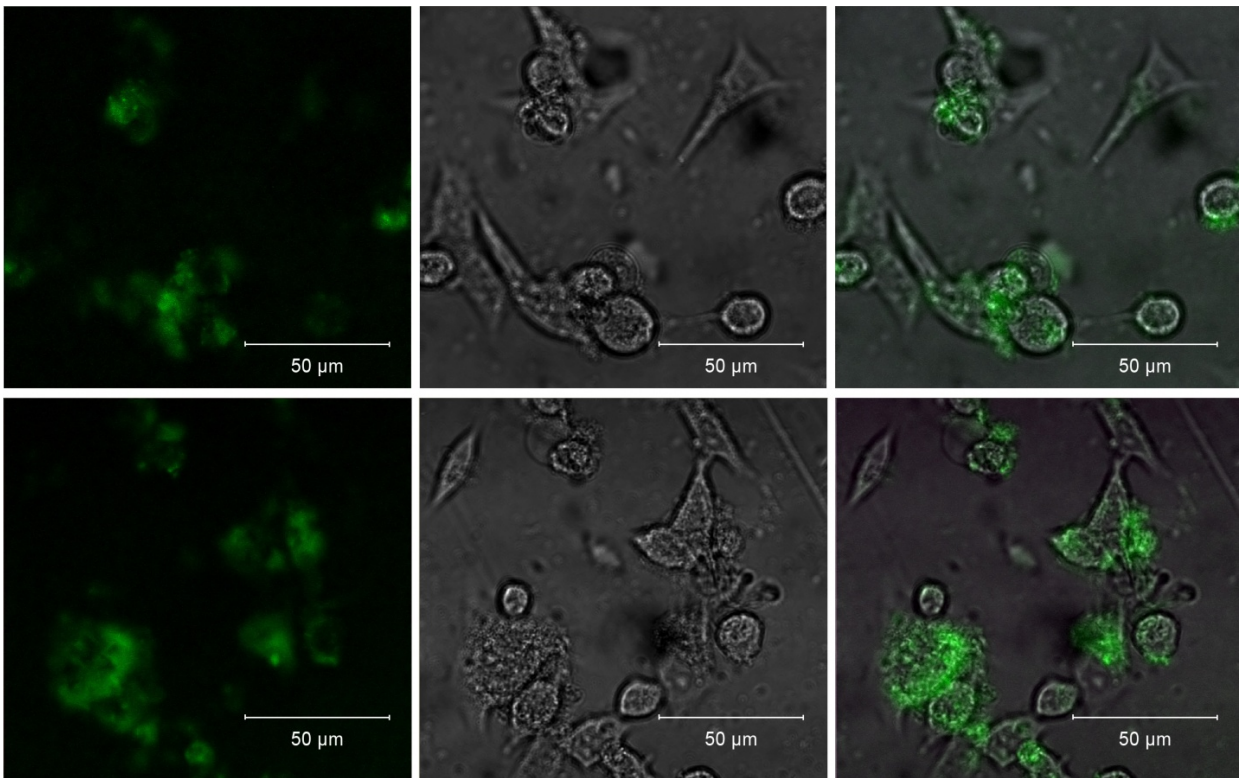

**Figure S22:** MCF-7S cells stained by O-dots (125 µg/mL) without fixation. Left to right: fluorescence microscopy image (488 nm excitation), bright-field microscopy image, and overlay.

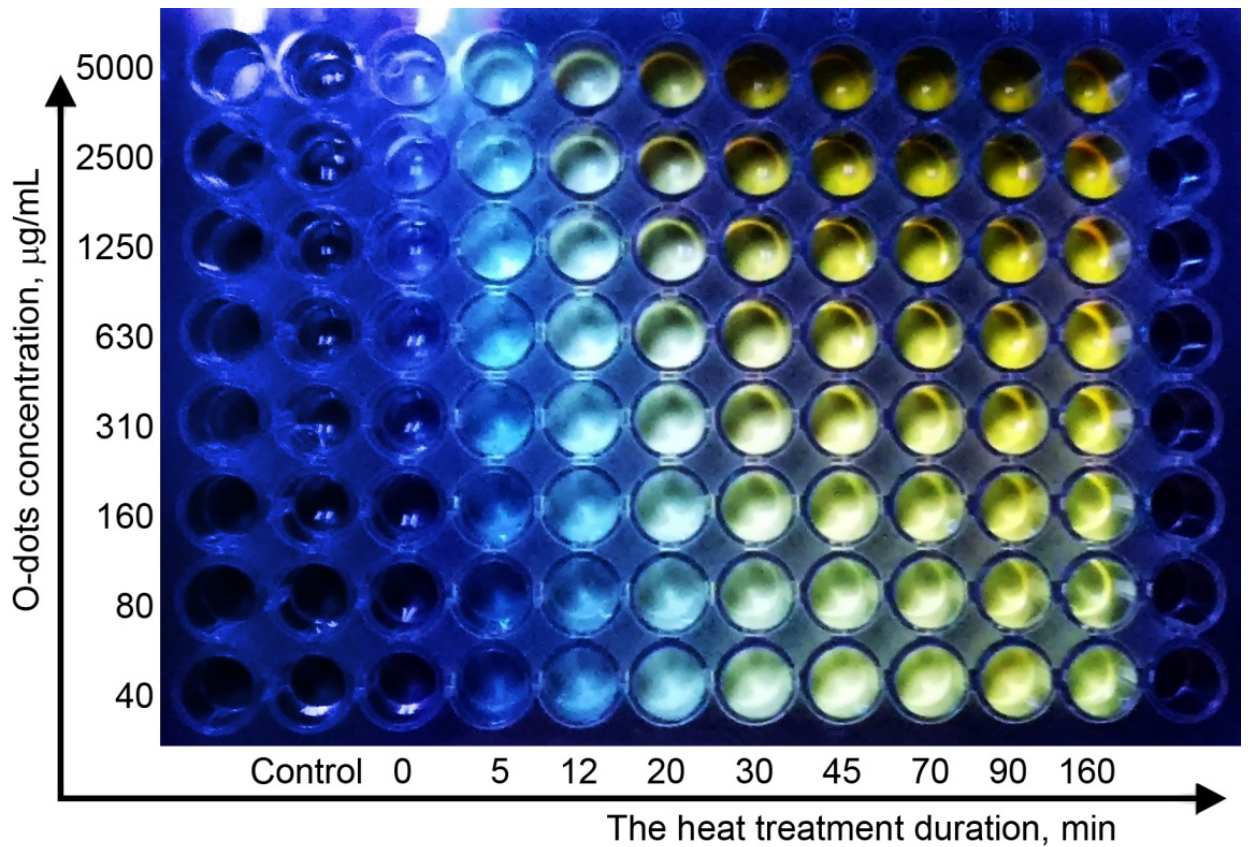

**Figure S23:** UV-illuminated multi-well plate with ST-cells supplemented with O-dots obtained by heat treatment of urea: citric acid mixture (5:1 mol) at 160 °C for 0–160 min.
